# Supplementary material
Source: Springer Nature journal article supplement (https://www.springermedizin.de/resource/supplementary/12904_2014_234_MOESM1_ESM.pdf/9517830)

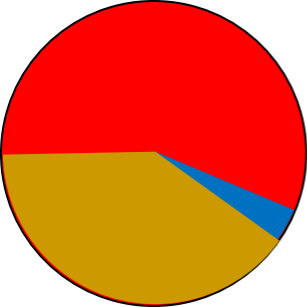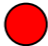

**ER alone**  
**n=33**

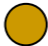

**Only ER and OWD**  
**n=26**

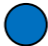

**ER and OWD and ST**  
**n=2**

Supplement: MOESM1 [file 9517830]
